# Supplementary material for: Genome-Wide Identification of 14-3-3 gene family reveals their diverse responses to abiotic stress by interacting with StABI5 in Potato (Solanum tuberosum L.)
Source: Front Plant Sci. 2023 Jan 9;13:1090571. doi: 10.3389/fpls.2022.1090571 (PMC9868832; doi:10.3389/fpls.2022.1090571)
Supplement: Supplementary Table 5 — FPKM of potato 14-3-3s in different tissues. [file Table_5.xlsx]

## Sheet: 组织
Names	BV_L [DM Leaves]	BV_N [DM Roots (in vitro, Media B)]	BV_O [DM Shoots (in vitro, Media B)]	BV_P_P [DM Callus (10 & 11 wks old, Leaves & Stems, in vitro, Media D)]	BV_P_R [DM Tubers (Whole, Sample 1)]	BV_P_V [DM Sepals]	BV_P_X [DM Stamens]	BV_Q [DM Stolons (Above & Below Ground)]	BV_T [DM Whole Mature Flowers]	BV_U [DM Petioles]	BV_W [DM Petals]	BV_Y [DM Carpels]	PE_BV_P_P [DM Callus (Paired Ends)]
StGF14a	6.97719	8.31328	7.36859	7.69123	7.59621	7.58895	7.13888	7.86934	7.18767	7.62751	7.25637	7.38623	7.75873
StGF14b	4.50589	4.84348	5.50428	4.09924	3.26366	4.57225	4.23452	4.41924	4.11162	3.88876	3.90611	3.62328	3.97757
StGF14c	4.18811	6.35164	6.31134	7.12465	6.23834	6.50713	5.42306	6.67556	6.16808	6.2158	6.09197	7.06021	7.14884
StGF14d	6.34513	6.2227	6.52279	7.03469	7.50215	6.33118	7.70875	6.61551	7.23431	7.05279	5.70942	5.98646	7.15464
StGF14e	6.88462	6.58279	7.3105	7.50895	7.0422	7.01577	8.46409	7.39736	7.99802	7.99281	7.73969	7.05496	7.72946
StGF14f	5.73535	5.77806	6.66612	8.02917	5.12342	6.7626	7.57697	6.41754	7.49707	7.4735	7.8207	6.97213	8.17977
StGF14g	0	0	0	0	0	0	3.36422	0	4.01288	0	0	0	0
StGF14h	7.83602	6.56232	7.63985	7.62078	6.4036	7.59451	7.28864	7.3927	7.71247	8.24821	8.02307	7.89852	7.69864
StGF14i	8.07002	6.25743	7.71791	7.5597	6.67813	7.7904	7.58292	7.79578	7.61586	8.3569	7.77	7.29499	7.67938
StGF14j	3.30977	6.35505	7.21355	7.18621	5.5453	5.5748	6.098	6.11368	5.38017	5.86607	5.41915	5.19851	7.25152
StGF14k	5.07538	5.39872	5.67607	6.31921	6.36848	5.32362	7.61979	5.31915	7.50114	5.50854	6.23669	3.20408	6.30922
StGF14l	6.36888	4.84811	5.8898	6.41641	4.45525	5.95664	6.23711	5.84498	6.52241	7.13047	6.71698	6.08152	6.46896
